# Supplementary material for: Endocannabinoids and their receptors modulate endometriosis pathogenesis and immune response
Source: eLife. 2024 Aug 9;13:RP96523. doi: 10.7554/eLife.96523 (PMC11315450; doi:10.7554/eLife.96523)
Supplement: Supplementary file 1. [file elife-96523-supp1.xlsx]

## Sheet: Supplementary file 1a
Standards	Catalog number
2­Arachidonoyl Glycerol­d5	362162
2­Arachidonoyl Glycerol­d8	362160
Oleoyl Ethanolamide	90265
Palmitoyl Ethanolamide­d4	10007824
Arachidonoyl Ethanolamide­d8	390050
Oleoyl Ethanolamide­d4	9000552
Arachidonoyl Ethanolamide	90050
Palmitoleoyl Ethanolamide	10965
Arachidonoyl Ethanolamide­d4	10011178
2­Arachidonoyl Glycerol	62160

## Sheet: Supplementary file 1b
Instrumentation	LC-MS : QQQ Agilent 6495 coupled with an Infinity 1260 HPLC system
LC Method	Column: CSH C18 2.1x100mm 3.5μm de Waters
	Mobile Phase A: 50/50 H2O/ACN +0.4 %FA
	Mobile Phase B: 90/10 IPA/ACN +0.4% FA
	Gradient: 30% to 45% B in 10min.
	Total run time: 20 min
	Volume of injection: 10µL
MS Method	ESI positive ionization
	MRM Transitions:
	AEA à 348.3 -> 62.1
	AEA-d4 à 352.0 -> 66.0
	OEA à 326.3 -> 62.0
	OEA-d4 à 330.3 -> 66.0
	PEA à 300.3 -> 62.0
	PEA-d4 à 304.3 -> 62.0
	2-AG à 379.3 -> 91.0
	2-AG d5 à 384.3 -> 91.0

## Sheet: Supplementary file 1c
	Mass Channel	Antibody Target	Clone	Provider	Dilution
1	141Pr	aSMA	polyclone	Abcam	1;100
2	142Nd	CD45R (B220)	RA3-6B2	Abcam	1;100
3	143Nd	Vimentin	D21H3	Cell Signaling Technology	1;200
4	144Nd
5	145Nd	NK1.1	E6Y9G	Cell Signaling Technology	1;50
6	146Nd	CD31	SZ31	Cedarlane labs	1;100
7	147Sm	CD45	D3F8Q	Cell Signaling Technology	1;50
8	148Nd	Pan-CK	AE1/AE3	Standard BioTools	1;100
9	149Sm	CD11b	EPR1344	Standard BioTools	1;100
10	150Nd	CD19-Biotin	6OMP31	ThermoFisher	1;100
11	151Eu	CD44	E7K2Y	Cell Signaling Technology	1;100
12	152Sm
13	153Eu	CD8a	D4W2Z	Cell Signaling Technology	1;100
14	154Sm	CD11c	D1V9Y	Cell Signaling Technology	1;50
15	155Gd
16	156Gd	PD-L1	D5V3B	Cell Signaling Technology	1;50
17	158Gd	FoxP3	D6O8R	Cell Signaling Technology	1;50
18	159Tb	F4/80	D2S9R	Cell Signaling Technology	1;50
19	160Gd
20	161Dy
21	162Dy	CD3e	D4V8L	Cell Signaling Technology	1;100
22	163Dy
23	164Dy	CD4	4SM95	ThermoFisher	1;50
24	165Ho	CD68	EPR23917-164	Abcam	1;100
25	166Er	Ly6G	1A8	Standard BioTools	1;50
26	167Er	PD-1	polyclonal	Bio-Techne	1;50
27	168Er	Ki67	B56	Standard BioTools	1;100
28	169Tm	CD206	polyclonal	Cell Signaling Technology	1;100
29	170Er	CD3	CD3-12	Abcam	1;50
30	171Yb	GranzymB	D6E9W	Cell Signaling Technology	1;100
31	172Yb	cleaved Casp3	Asp175	Cell Signaling Technology	1;100
32	173Yb
33	174Yb	MHC-II	M5/114.15.2	Bio-Techne	1;100
34	175Lu	pS6	N7-548	Standard BioTools	1;100
35	176Yb	HH3	D1H2	Standard BioTools	1;300
